# Supplementary material for: Lipid Profile, Eating Habit, and Physical Activity in Children with Down Syndrome: A Prospective Study
Source: MDPI journal article supplement (doi:10.3390/diseases12040068), 2024-03-29

**Figure S1. Variation of LDL at baseline visit and 2-year follow-up visit.**

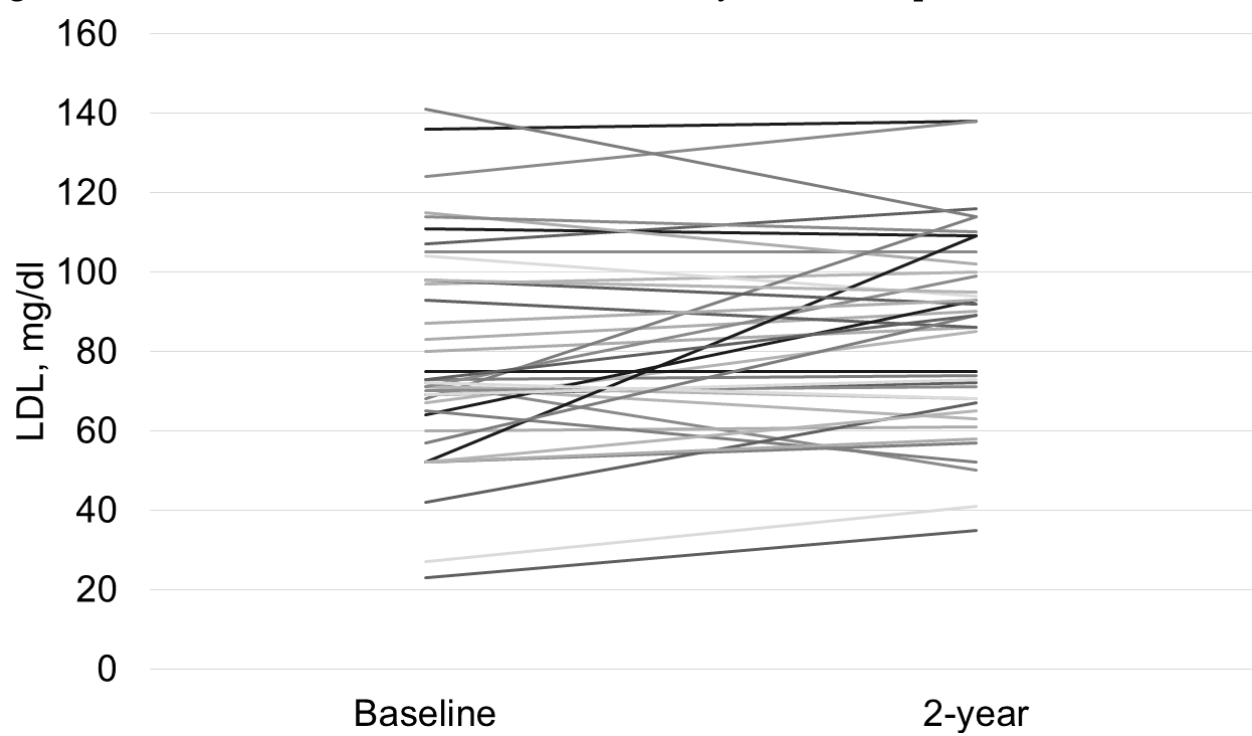

**Figure S2. Variation of HDL at baseline visit and 2-year follow-up visit.**

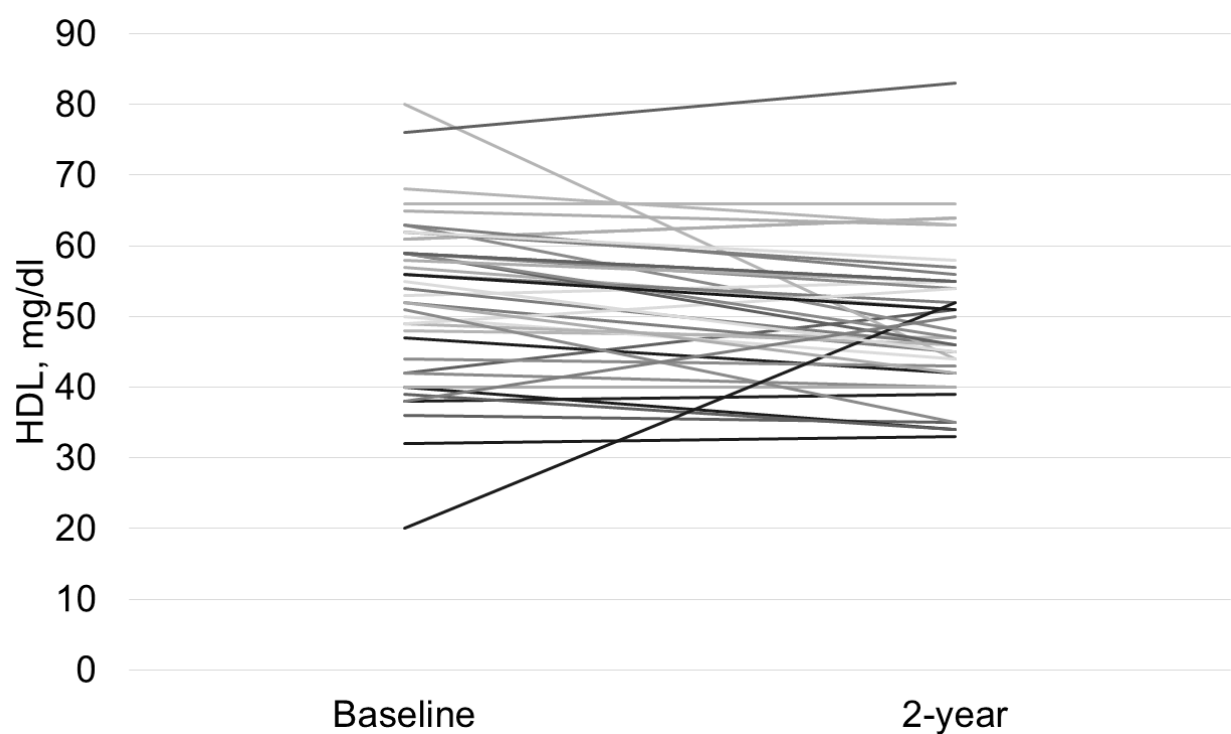

**Figure S3. Variation of TGC at baseline visit and 2-year follow-up visit.**

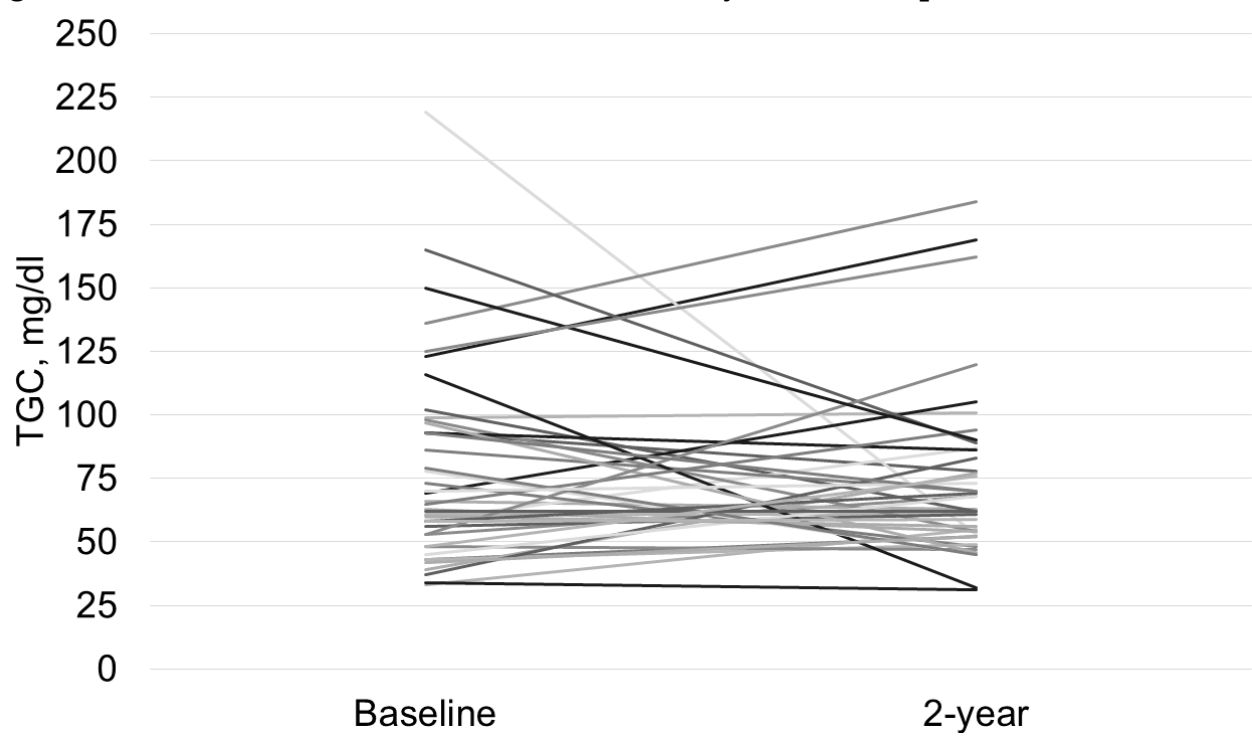

Supplement: s1 [file s1]
